# Supplementary material for: PRMT5 and the role of symmetrical dimethylarginine in chromatoid bodies of planarian stem cells
Source: Oxford University Press journal article supplement (doi:10.1242/dev.076182), 2012-02-09
Supplement: dev076182supptables1.pdf [file dev076182supptables1.pdf]

**Table S1. Identification of type I and type II protein arginine methyl transferases in *S. mediterranea***

| <b>Hs Protein</b>       | <b>Smed Homolog</b> | <b>Smed Genome</b> | <b>Human -&gt; Smed TBLASTN E-value</b> | <b>Smed -&gt; Human Reciprocal BLASTP</b> |
|-------------------------|---------------------|--------------------|-----------------------------------------|-------------------------------------------|
| <b>TypeII</b>           |                     |                    |                                         |                                           |
| HsPRMT5                 | SmedPRMT5           | >lcl mk4.002031.05 | 3.00E-136                               | 3.00E-136                                 |
| HsPRMT7                 | SmedPRMT7           | >lcl mk4.002889.01 | 2.00E-77                                | 1.00E-83                                  |
| HsPRMT9/FBXO11          | -                   | -                  |                                         |                                           |
| <b>TYPE I</b>           |                     |                    |                                         |                                           |
| HsPRMT1                 | SmedPRMT1A          | >lcl mk4.001246.12 | 2.00E-126                               | 2.00E-126                                 |
|                         | SmedPRMT1B          | >lcl mk4.005105.01 | 1.00E-118                               | 1.00E-118                                 |
| HsPRMT3                 | SmedPRMT3           | >lcl mk4.001683.06 | 6.00E-56                                | 1.00E-86                                  |
| HsPRMT4/CARM1           | SmedPRMT4           | >lcl mk4.002107.06 | 1.00E-124                               | 1.00E-136                                 |
| HsPRMT6                 | SmedPRMT6           | >lcl mk4.017465.00 | 2.00E-27                                | 2.00E-43                                  |
| HsPRMT8                 | SmedPRMT8           | >lcl mk4.019775.00 | 5.00E-25                                | 1.00E-36                                  |
| <b>UNKNOWN FUNCTION</b> |                     |                    |                                         |                                           |
| HsPRMT2                 | -                   | -                  |                                         |                                           |
| HsPRMT10                |                     |                    | -                                       |                                           |
| HsPRMT11/FBXO10         | -                   | -                  |                                         |                                           |

top hit is Smed 002107  
(5.00E-42)  
top hit is Smed 005105  
(8.00E-90)
